# Supplementary material for: Phosphoproteomics reveals that the hVPS34 regulated SGK3 kinase specifically phosphorylates endosomal proteins including Syntaxin-7, Syntaxin-12, RFIP4 and WDR44
Source: PubMed Central journal article supplement (PMC6824681; doi:10.1042/bcj20190608), 2019-10-30

## Supplementary Material

**Figure S1: Total proteome changes in the phosphoproteomic screens.** Volcano plot depicting the total proteome statistical significance between (A) the HEK 293 Wild type (WT) and SGK3 knock-out (KO) (N= 4) from PS1 on the left panel and (B) for the HEK293 cells treated DMSO and 14H conditions (N=3) from PS2 on the right panel. (A) The significantly enriched protein groups in WT HEK293 cells are highlighted in blue filled circles and protein groups that are enriched in KO cells are highlighted in red filled circles. (B) For PS2, the significantly enriched protein groups in DMSO treated cells are highlighted in blue filled circles and protein groups that are enriched in 14H treated cells are highlighted in red filled circles. The statistical significance was defined by the independent two-tailed t-test, which is corrected by permutation-based FDR of 5% using the Perseus software.

**Figure S2: MPST1, PANK4, ITSN1, ATXN1 and AFF4 are phosphorylated by both SGK3 and Akt *in vitro*.** 1-2  $\mu\text{g}$  of GST-NDRG1 (A), GST-MPST (B), GST-ITSN1 (C), GST-ATXN1 (D), GST-PANK4 (E) and GST-AFF4 (F), were incubated with 0.5  $\mu\text{g}$  active SGK3 or 0.125  $\mu\text{g}$  active Akt and [ $\gamma^{32}\text{P}$ ]-ATP, in the presence or absence of 14H or AZD5363 (1  $\mu\text{M}$ ) for 30 min. The reactions were terminated by the addition of SDS loading buffer and separated by SDS/PAGE. Incorporation of [ $\gamma^{32}\text{P}$ ]-ATP was detected by autoradiography (top panels) and proteins were detected by Coomassie staining (bottom panels).

**Figure S3: Phosphomapping of STX7 and RFIP4 by Edman degradation and mass spectrometry.** GST-STX7 (A, B) and GST-RFIP4 (C,D) were incubated with active SGK3 in the presence of [ $\gamma^{32}\text{P}$ ]-ATP for 80 min. The reactions were terminated by the addition of SDS loading buffer and separated by SDS/PAGE. Proteins were detected by Coomassie staining and the bands corresponding to GST-SXT7 or GST-RFIP4 were excised from the gel and subjected to trypsin digestion. The resultant peptides were separated by HPLC (A, GST-STX7; C, GST-RFIP4) and  $^{32}\text{P}$  radioactivity was detected using an online radioactivity detector. The largest peak fractions were analyzed by Edman degradation and mass spectrometry (B, GST-STX7; D, GST-RFIP4).

**Figure S4: SGK1 can phosphorylate STX7, STX12, RFIP4 and WDR44 *in vitro*.** 1-2  $\mu\text{g}$  of GST-STX7 (A), GST-STX12 (B), GST-WDR44 (C), GST-RFIP4 (D) and GST-NDRG1 (E) were incubated with 0.5  $\mu\text{g}$  active SGK1, 0.25  $\mu\text{g}$  active SGK3 or 0.08  $\mu\text{g}$  active Akt and [ $\gamma^{32}\text{P}$ ]-ATP, in the presence or absence of 14H or AZD5363 (1  $\mu\text{M}$ ) for 30 min. The reactions were terminated by the addition of SDS loading buffer and separated by SDS/PAGE. Incorporation of [ $\gamma^{32}\text{P}$ ]-ATP was detected by autoradiography (top panels) and proteins were detected by Coomassie staining (bottom panels).

**Figure S5: STX5 and STX16 are not phosphorylated by SGK3 in HEK293 cells. (A)** Phylogenetic analysis of the Syntaxins. Sequence alignment and phylogenetic analysis were performed using Clustal Omega. The syntaxins containing a potential SGK3 phosphomotif are indicated. (B) Wild type (WT) and SGK3 knock-out (KO) HEK293 cells were serum starved overnight, then treated for 1 h with 14H (1  $\mu\text{M}$ ), MK2206 (1  $\mu\text{M}$ ) or with DMSO, followed by stimulation with IGF1 (50 ng/ml) for 15 min. STX5 and STX16 phosphorylation was analyzed by Phos-tag assays (top panels, top panels, °phosphorylated, °non-phosphorylated). Phos-tag analysis of the same samples for STX7 was performed as a control. Control immunoblots were performed on normal gels with the indicated antibodies. Immunoblots were developed using the LI-COR Odyssey CLx Western Blot imaging system analysis with the indicated antibodies at 0.5-1  $\mu\text{g}/\text{mL}$  concentration.

**Figure S6: Generation of STX7 and STX12 knock-out HEK293 cell lines by CRISPR/Cas9.** For generating the STX7 knock-out (KO) cell line the guide RNAs targeted exon 2 of *STX7* gene, while for STX12 KO the guide RNAs targeted exon 1 of *STX12* gene. Two representative KO clones for each cell line are shown. All the clones were blotted for STX7, STX12 and GAPDH as a control.

Figure S1

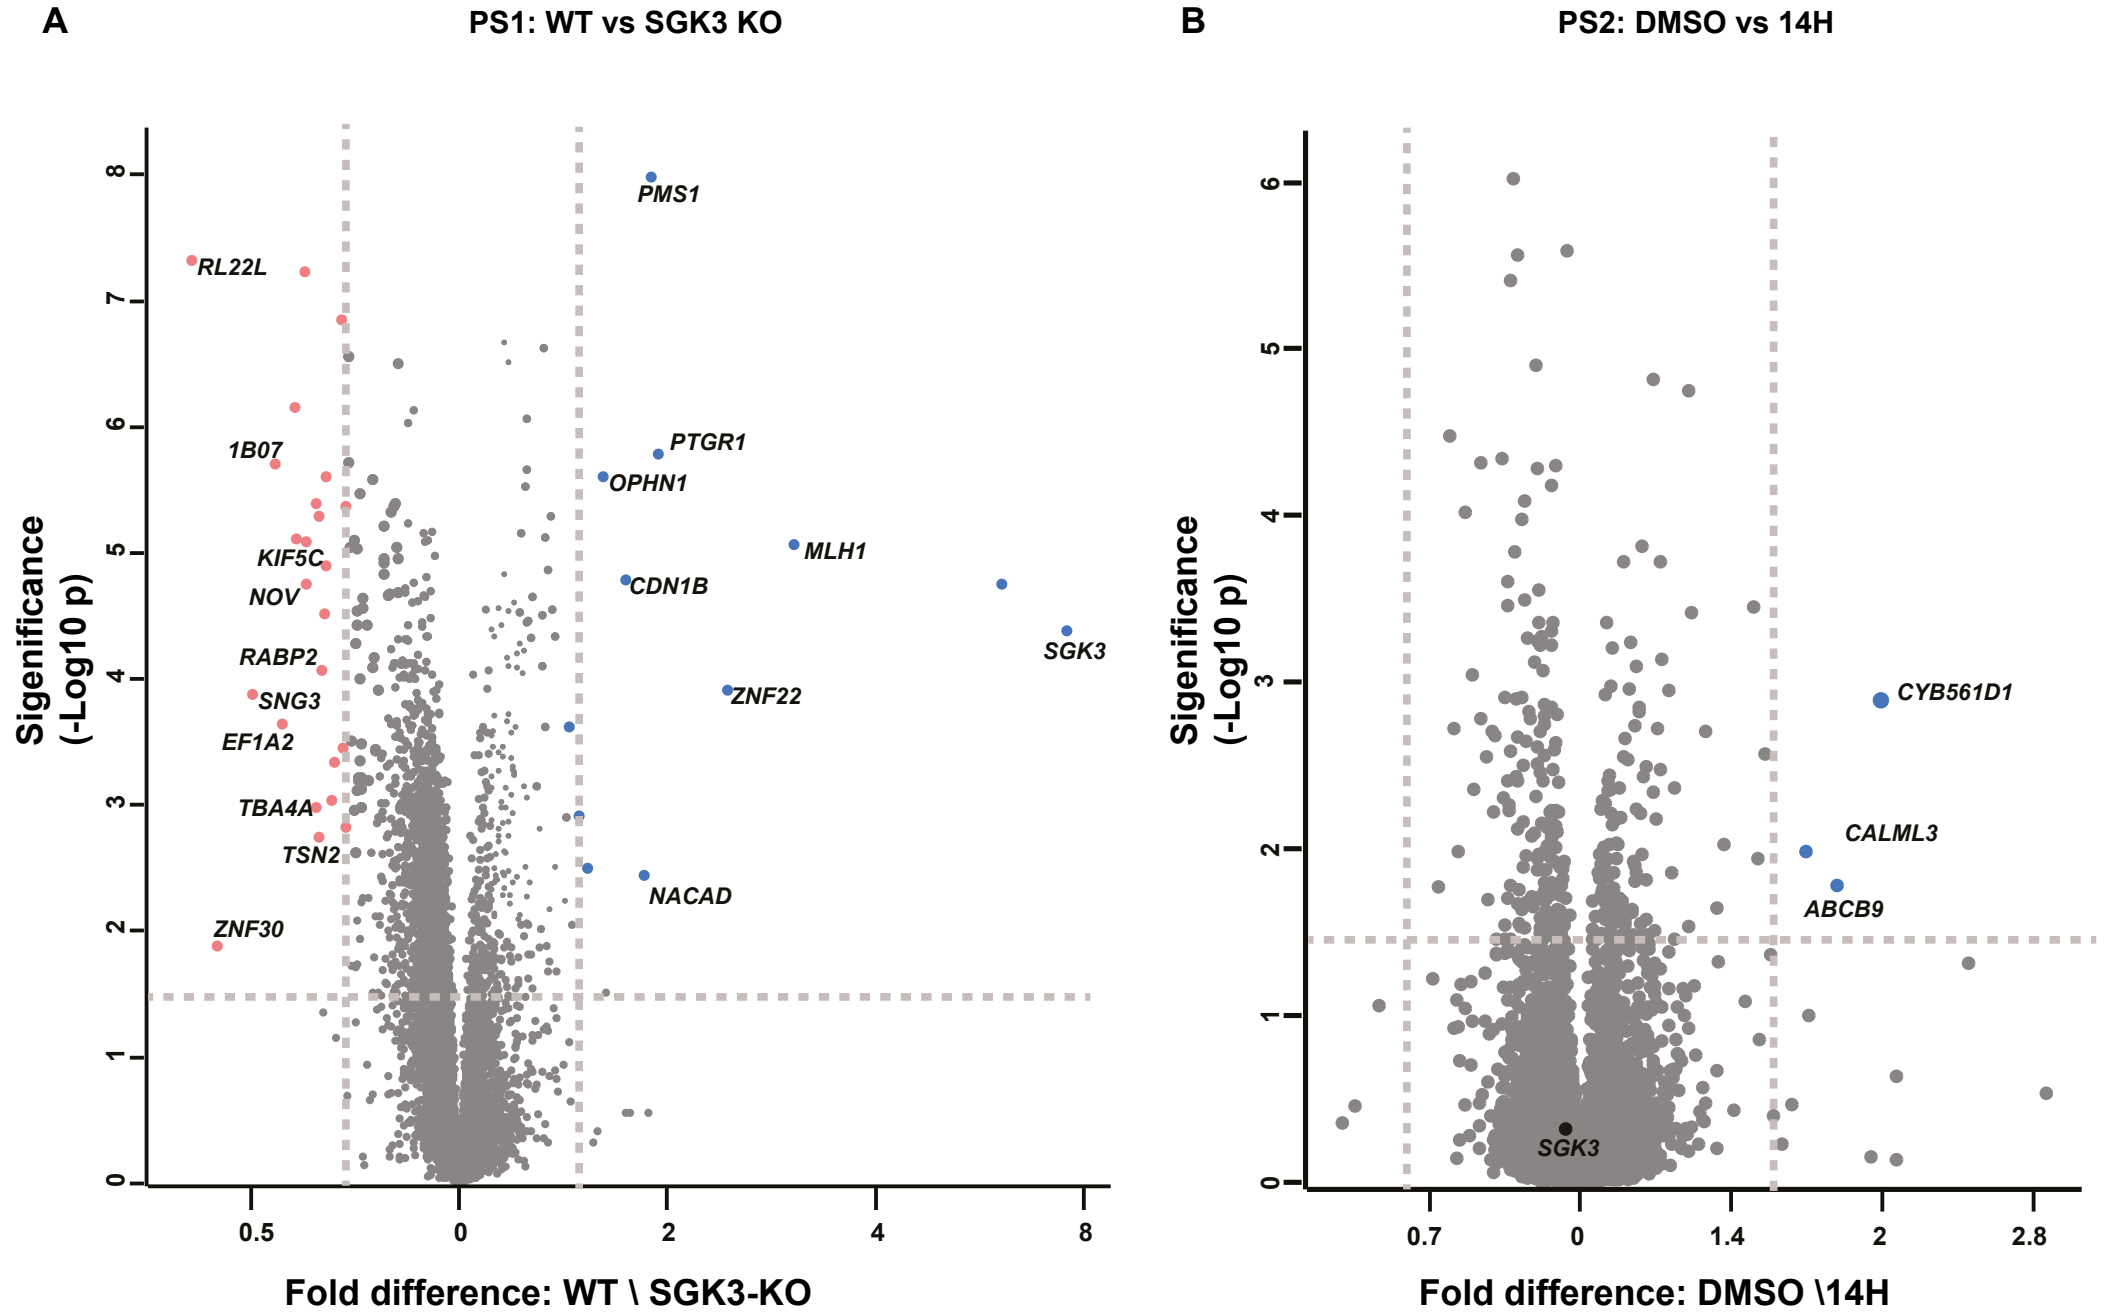

**Figure S2**

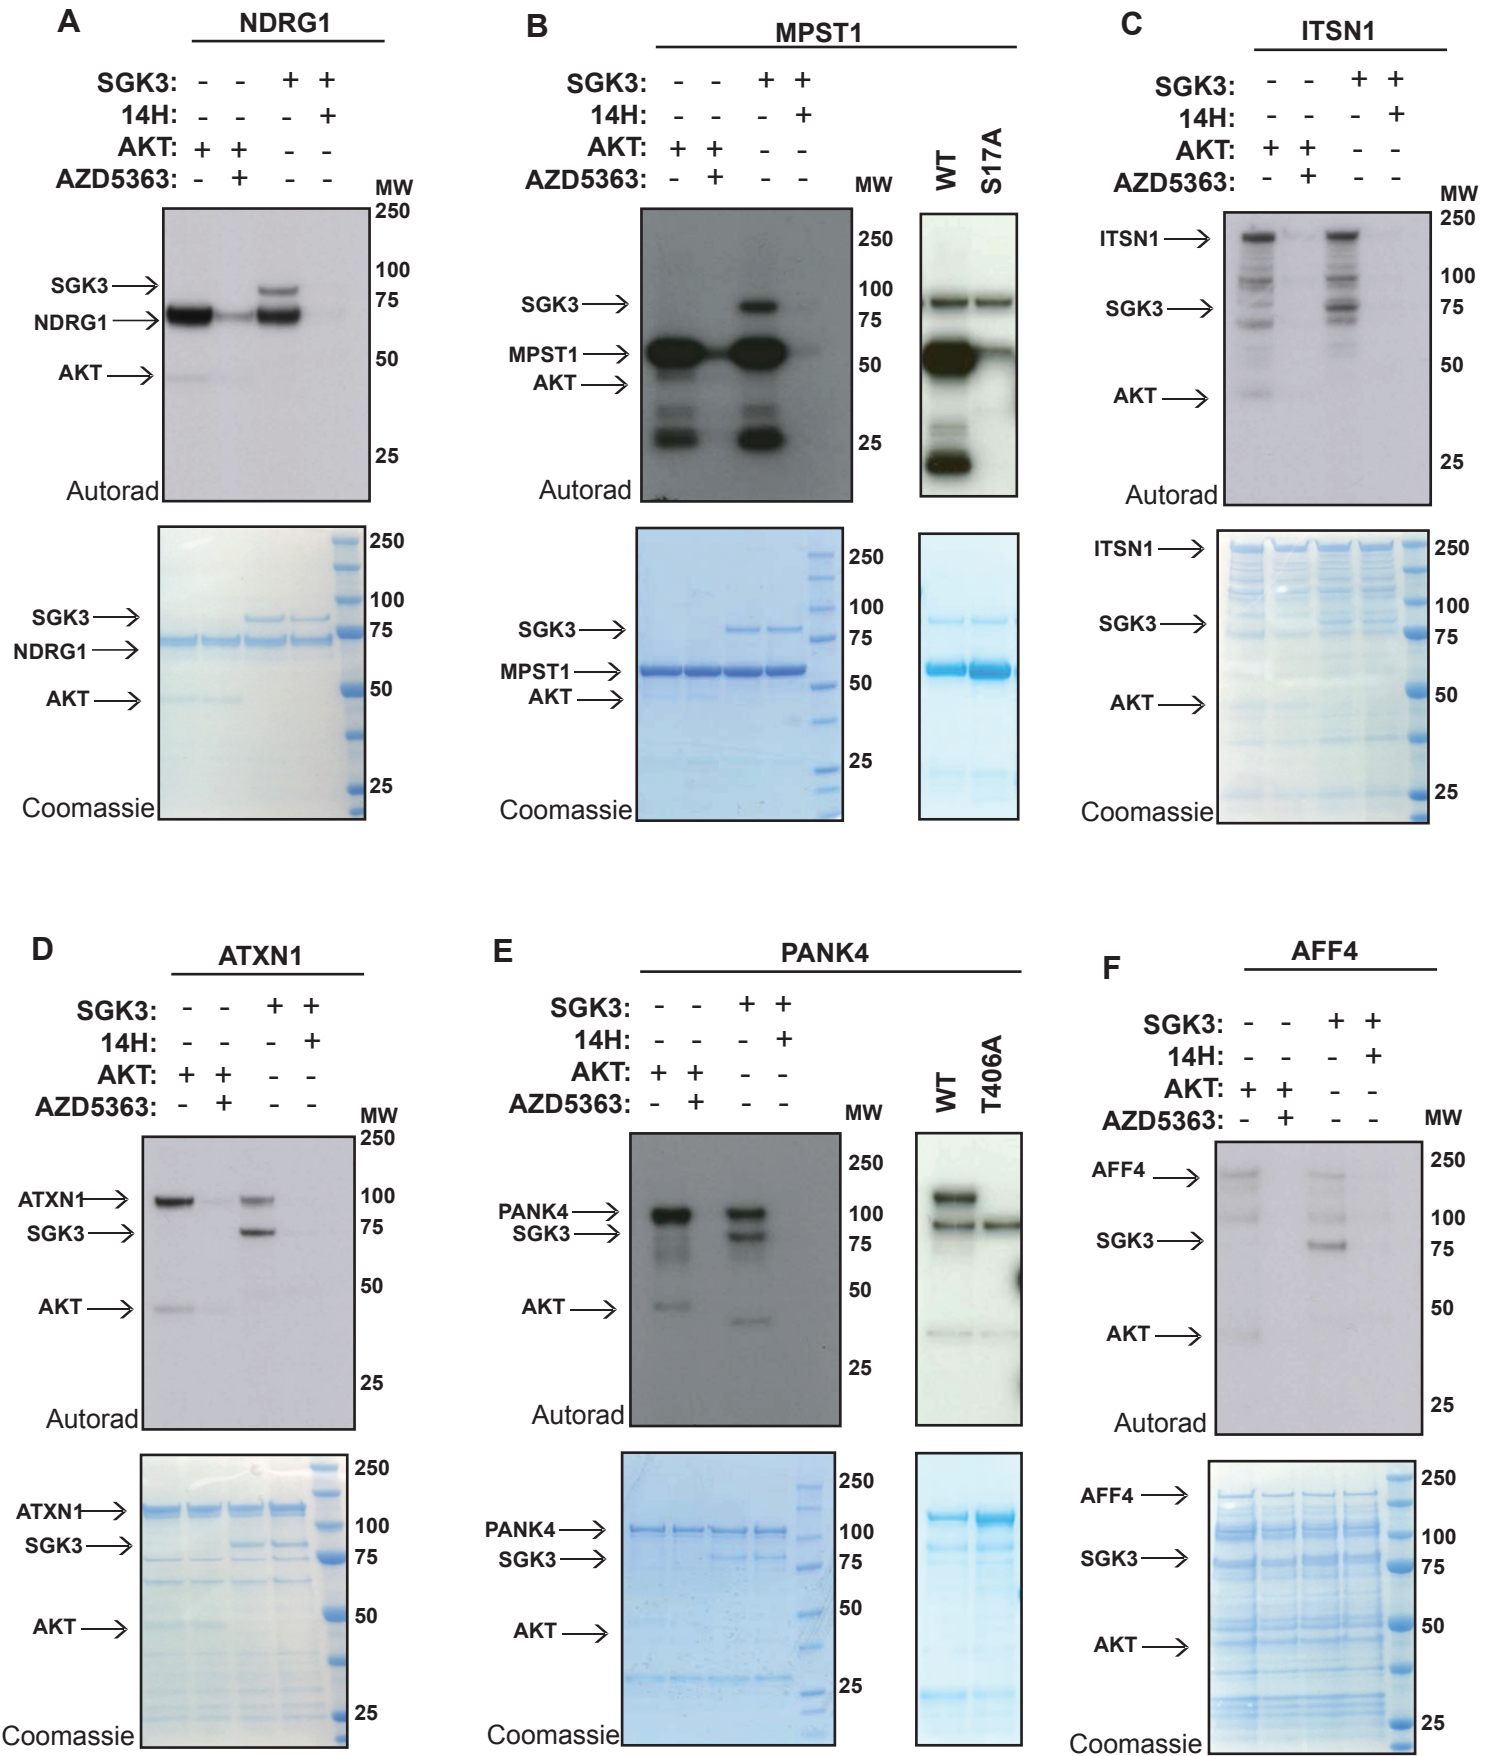

Figure S3

**STX7**

**A**

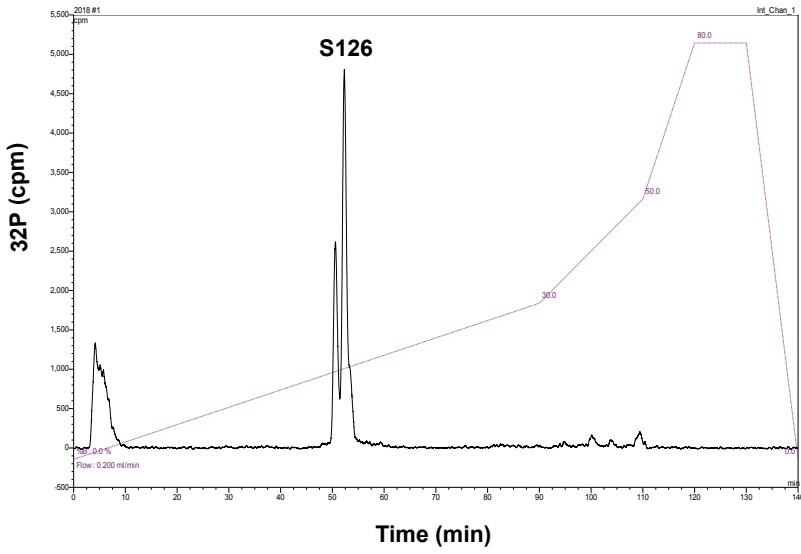

**B**

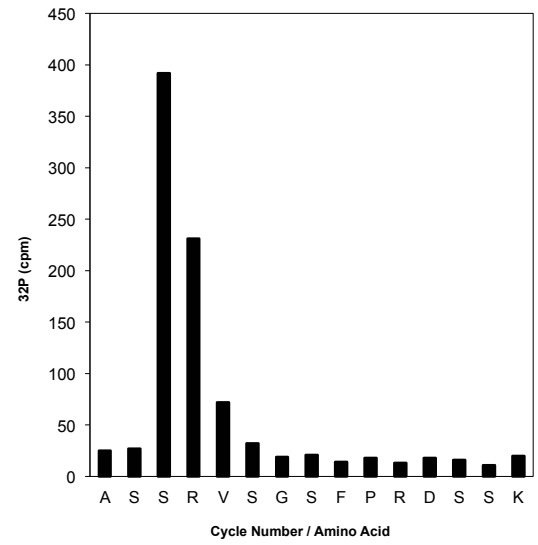

Phosphosite identified as S126  
**RXRXXS/T**  
**RVRAS**

**RFIP4**

**C**

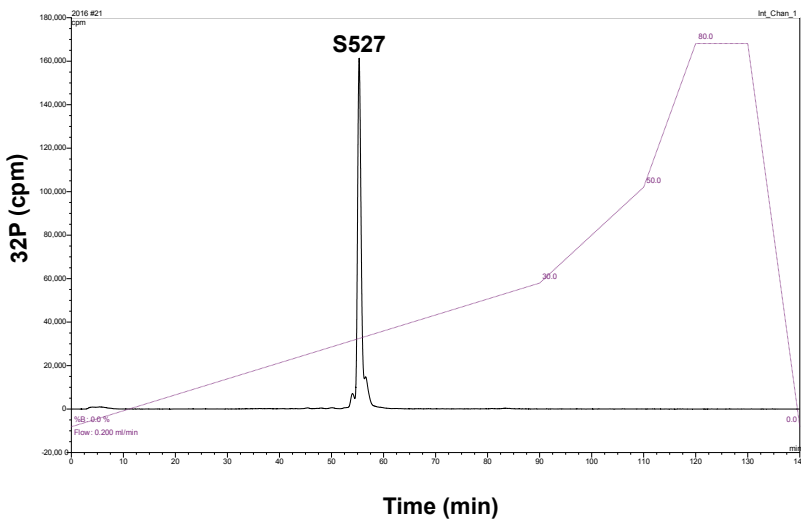

**D**

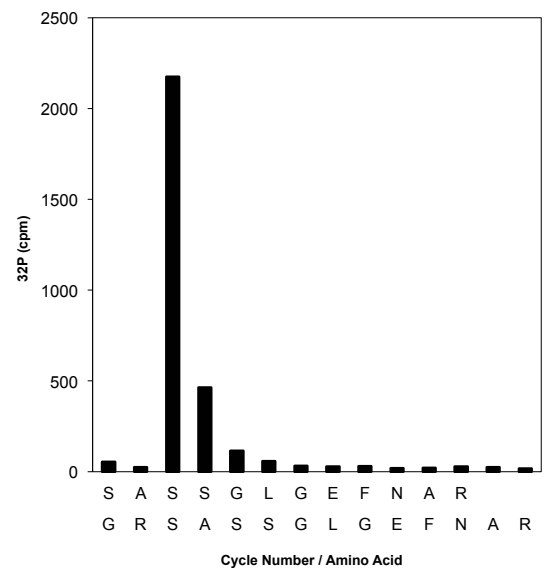

Phosphosite identified as S527  
**RXRXXS/T**  
**RGRSAS**

**Figure S4**

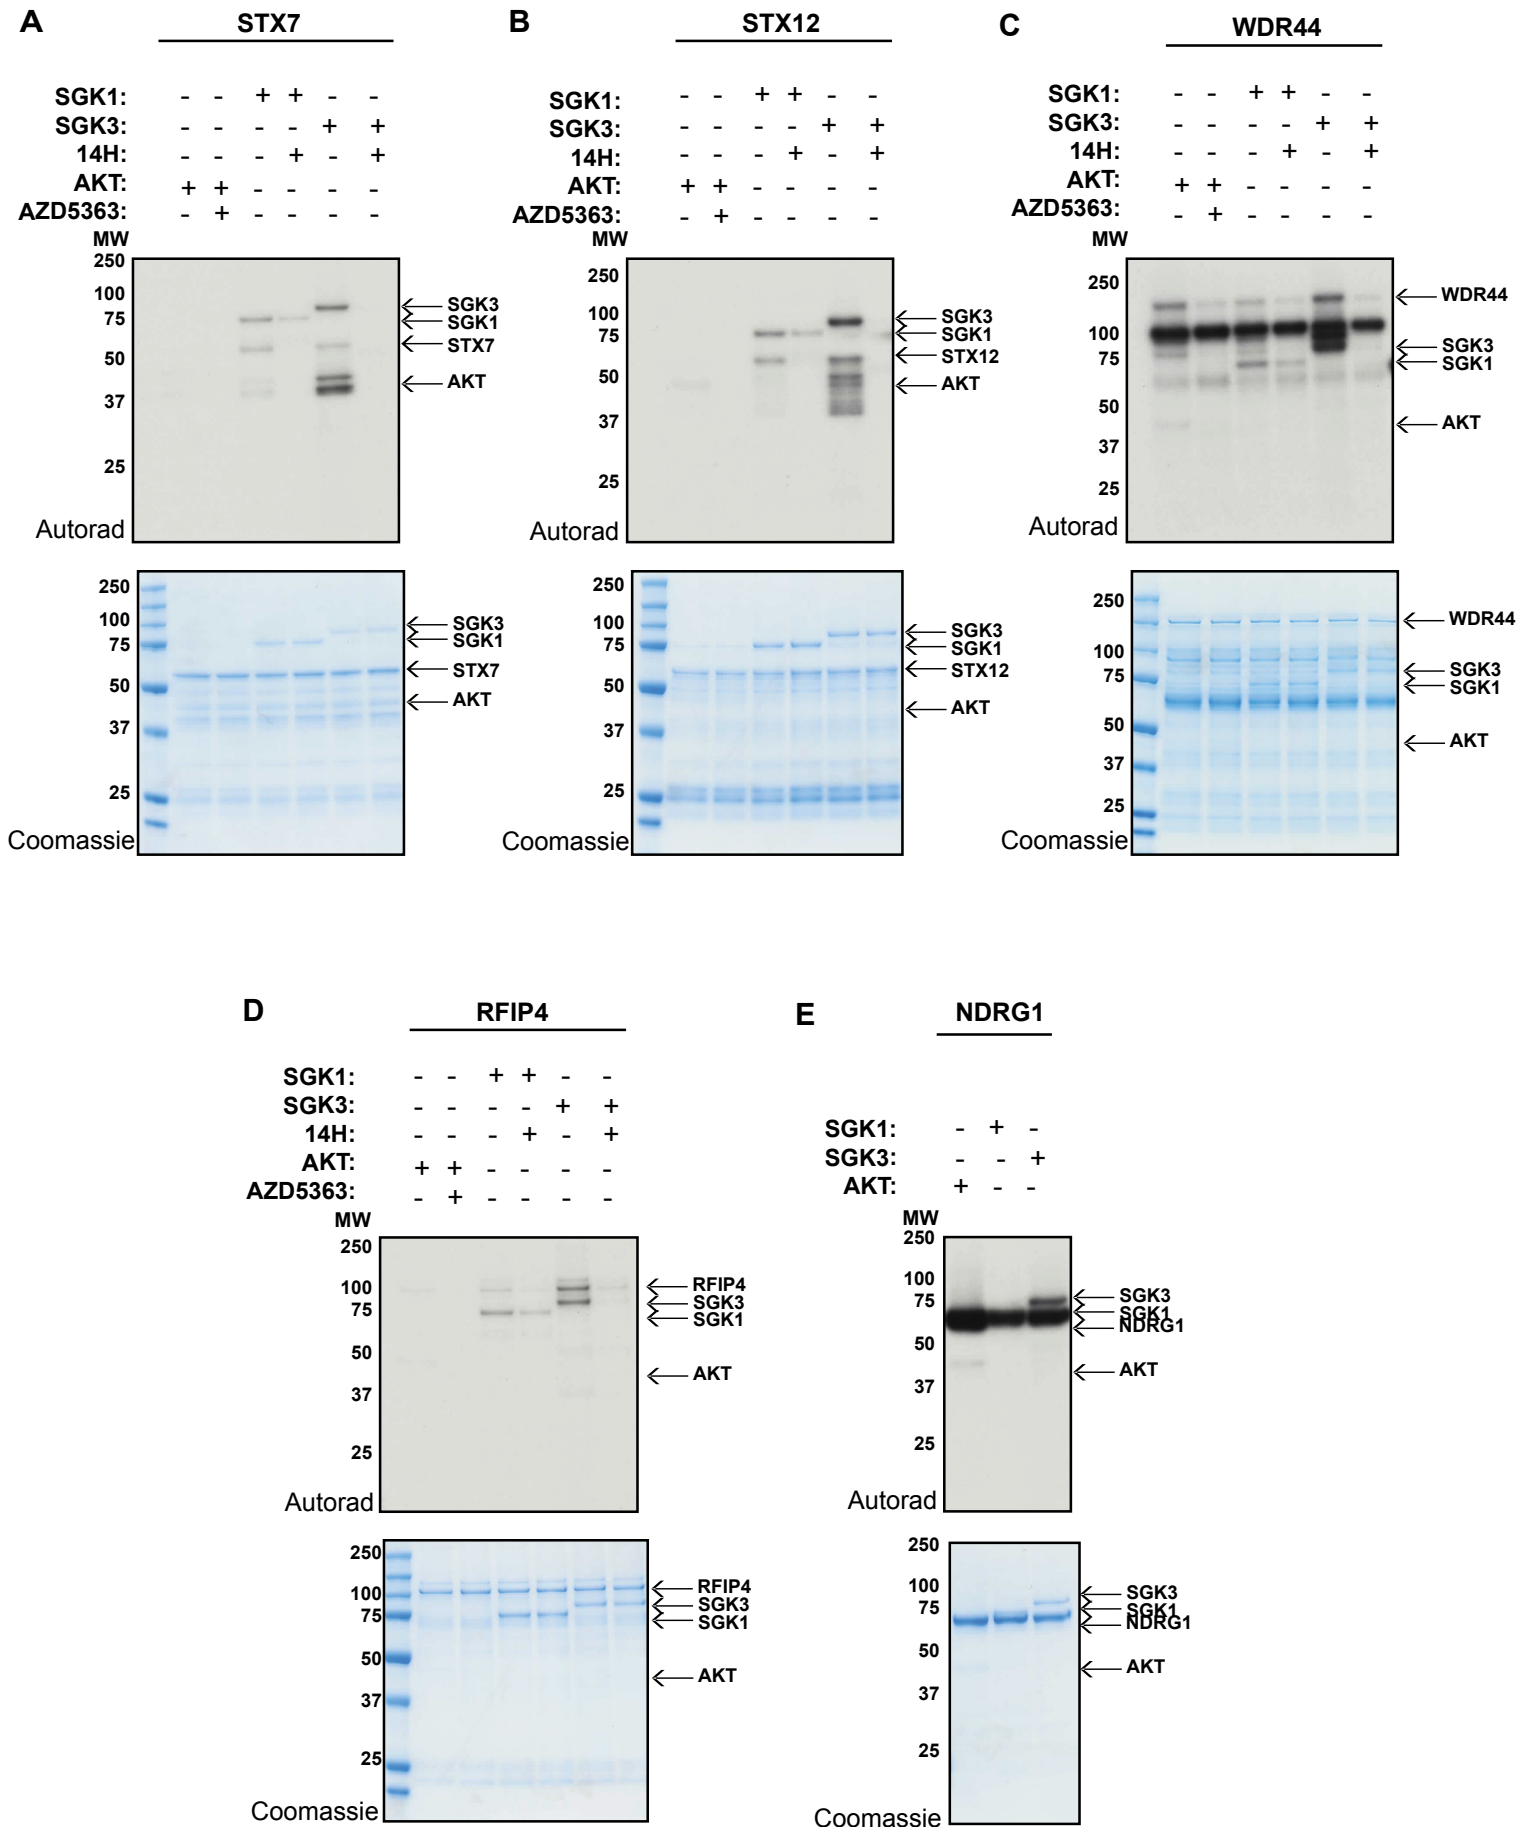

Figure S5

A

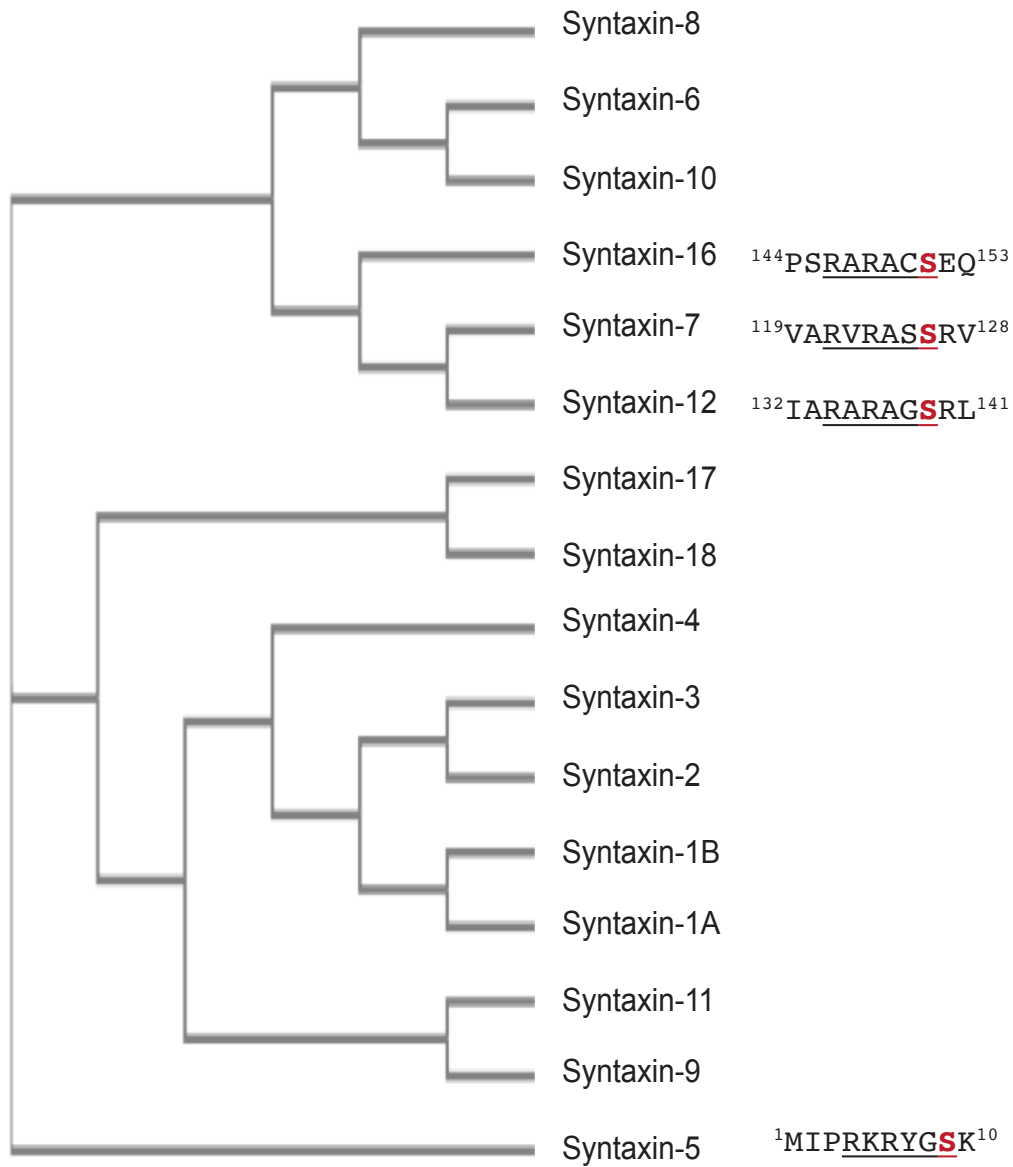

B

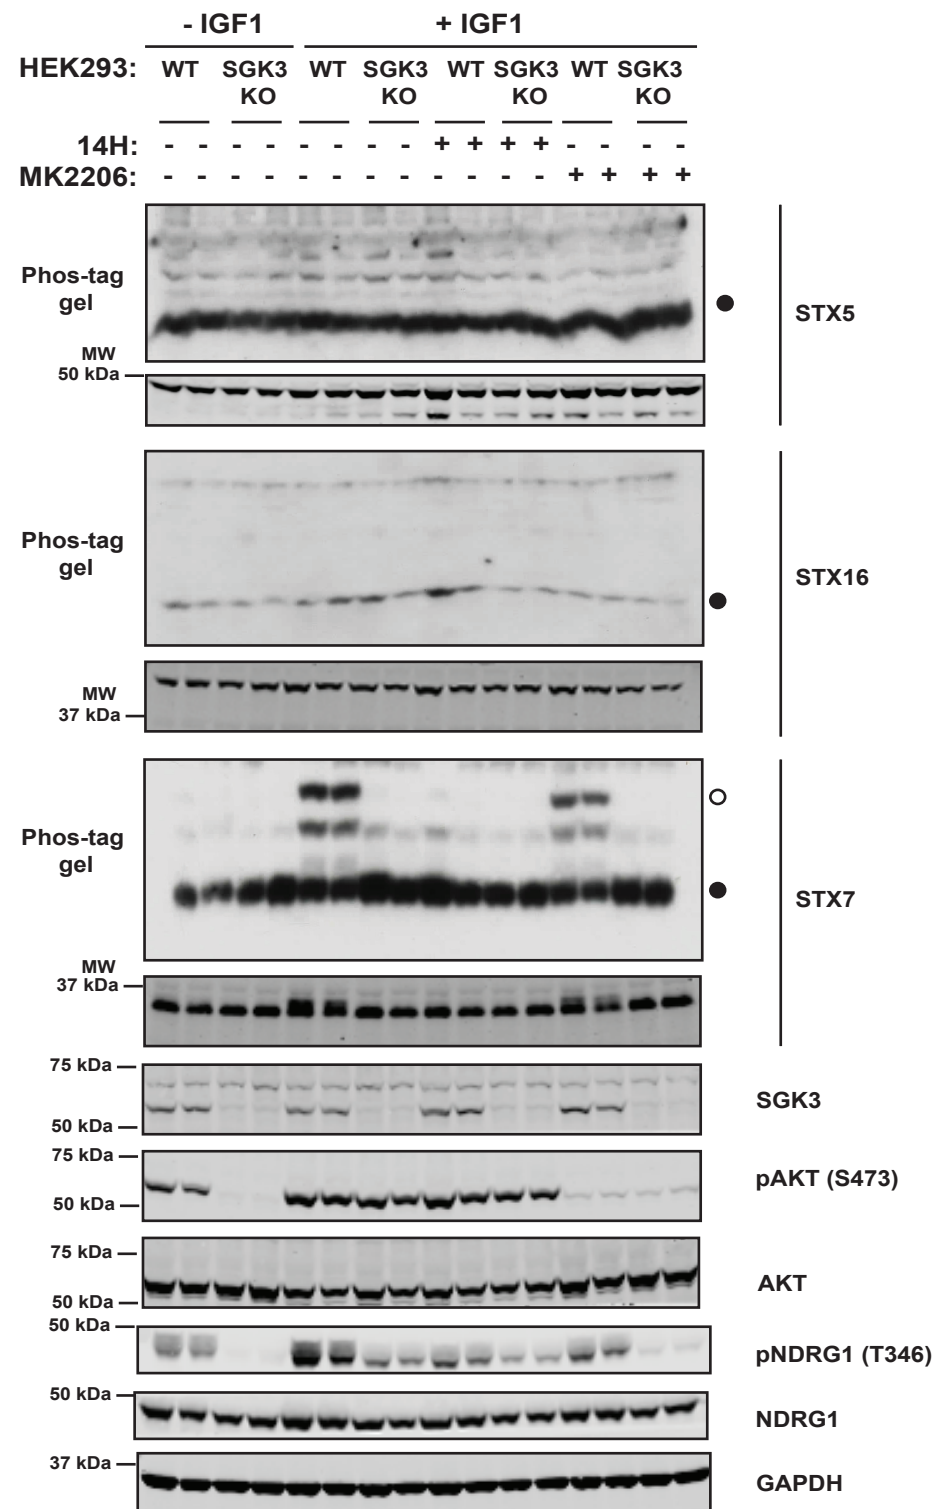

**Figure S6**

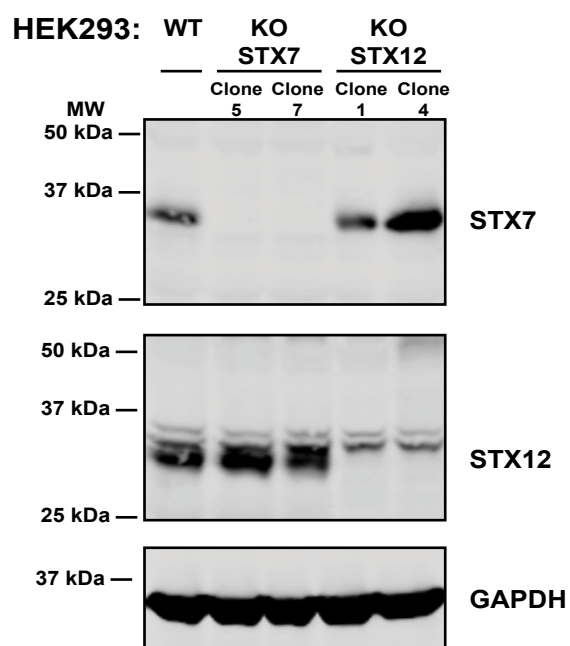

Supplement: BCJ-476-3081-s4.pdf [file BCJ-476-3081-s4.pdf]
